# Supplementary material for: An overview of the quality assurance and quality control of magnetic resonance imaging data for the Ontario Neurodegenerative Disease Research Initiative (ONDRI): pipeline development and neuroinformatics
Source: bioRxiv or medRxiv preprint supplement (doi:10.1101/2020.01.10.896415), 2020-01-16
Supplement: Supplementary file [file media-1.pdf]

Supplementary Table 1 - MRI Acquisition Protocols

| <b>STUDY</b>                           | <b>OBI - ONDRI</b> |              |                      |
|----------------------------------------|--------------------|--------------|----------------------|
| <b>SEQUENCE</b>                        | <b>3DT1</b>        |              |                      |
| <b>Protocol</b>                        |                    |              |                      |
| Vendor                                 | GE                 | Philips      | Siemens              |
| Field Strength                         | 3T                 | 3T           | 3T                   |
| Model                                  | Discovery          | Achieva      | Skyra/Trio/Prisma    |
| Version                                | 22                 | 3.2.3        |                      |
| Sequence Name                          | 3D FAST SPGR       | 3D TFE       | 3D MP-RAGE           |
| Imaging Options                        | IrP- Asset         | Fast (Sense) | iPat                 |
| <b>Pulse Timing</b>                    |                    |              |                      |
| TE (ms)                                | Min full           | Min (3.3)    | 2.98                 |
| TR (ms)                                | Min                | Min (7.3)    | 2300                 |
| Flip Angle (°)                         | 11                 | 9            | 9                    |
| TI (ms)                                | 400                | 945          | 900                  |
| <b>Scan Range</b>                      |                    |              |                      |
| FOV (in-plane) (mm)                    | 256 x 256          | 256 x 248    | 256 x 256            |
| Slice Thickness (mm)                   | 1                  | 1            | 1                    |
| Gap Between Slices (mm)                | 0                  | 0            | 0                    |
| No. Slices                             | 176                | 176          | 176                  |
| <b>Acquisition</b>                     |                    |              |                      |
| Orientation                            | Sagittal           | Sagittal     | Sagittal             |
| Matrix Size                            | 256 x 256          | 256 x 248    | 256 x 256            |
| Voxel Size [L/R x A/P x I/S]           | 1 x 1 x 1          | 1 x 1 x 1    | 1 x 1 x 1            |
| NEX                                    | 1                  | 1            | 1                    |
| Acceleration Factor (Parallel factor*) | 2                  | 2            | 2                    |
| <b>Other</b>                           |                    |              |                      |
| Fat Suppression                        | None               | None         | None                 |
| Bandwidth                              | 31.25 (kHz)        | 228 (Hz/px)  | 240 (Hz/px)          |
| Echo Train Length                      | -                  | -            | -                    |
| <b>Coil Type</b>                       |                    |              |                      |
| Head                                   | X                  | X            | X                    |
| Channel                                | 8-12 (HNS)         | 8            | 12(Trio) 20 (Prisma) |
| <b>Time</b>                            |                    |              |                      |
| <b>PRESCAN TIME+</b>                   | 00:30              | 00:30        | 00:30                |
| <b>SCAN TIME</b>                       | 04:52              | 06:17        | 05:21                |
| <b>TOTAL TIME (MIN)</b>                | 05:22              | 06:47        | 05:51                |

|                                        |                    |                |                      |
|----------------------------------------|--------------------|----------------|----------------------|
| <b>STUDY</b>                           | <b>OBI - ONDRI</b> |                |                      |
| <b>SEQUENCE</b>                        | <b>PD/T2</b>       |                |                      |
| <b>Protocol</b>                        |                    |                |                      |
| Vendor                                 | GE                 | Philips        | Siemens              |
| Field Strength                         | 3T                 | 3T             | 3T                   |
| Model                                  | Discovery          | Achieva        | Skyra/Trio/Prisma    |
| Version                                | 22                 | 3.2.3          |                      |
| Sequence Name                          | FSE-XL             | TSE            | TSE                  |
| Imaging Options                        | EDR, Asset         | Fast (Sense)   | iPat                 |
| <b>Pulse Timing</b>                    |                    |                |                      |
| TE (ms) (2 echo scan)                  | Min full/86        | 13/100         | 10/93                |
| TR (ms)                                | 3000               | 3000           | 3000                 |
| Flip Angle (°)                         | 125                | 90             | 165                  |
| TI (ms)                                | -                  | -              | -                    |
| <b>Scan Range</b>                      |                    |                |                      |
| FOV (in-plane) (mm)                    | 240 x 240          | 240 x 240      | 240 x 240            |
| Phase FOV                              | 75%                | 75%            | 81%                  |
| Slice Thickness (mm)                   | 3                  | 3              | 3                    |
| Gap Between Slices (mm)                | 0                  | 0              | 0                    |
| No. Slices                             | 48                 | 48             | 48                   |
| <b>Acquisition</b>                     |                    |                |                      |
| Orientation                            | Oblique Axial      | Oblique Axial  | Oblique Axial        |
| Matrix Size                            | 256 x 256          | 256 x 254      | 256 x 256            |
| Voxel Size [L/R x A/P x I/S]           | 0.94 x 0.94 x 3    | 0.94x 0.94 x 3 | 0.94 x 0.94 x 3      |
| NEX                                    | 1                  | 1              | 1                    |
| Acceleration Factor (Parallel factor*) | 2                  | 2              | 2                    |
| <b>Other</b>                           |                    |                |                      |
| Fat Suppression                        | Yes (FAT-SAT)      | Yes            | Yes                  |
| Bandwidth                              | 20 (kHz)           | 222 (Hz/px)    | 181 (Hz/px)          |
| Echo Train Length                      | 12                 | 12             | 14                   |
| <b>Coil Type</b>                       |                    |                |                      |
| Head                                   | X                  | X              | X                    |
| Channel                                | 8-12 (HNS)         | 8              | 12(Trio) 20 (Prisma) |
| <b>Time</b>                            |                    |                |                      |
| <b>PRESCAN TIME+</b>                   | 00:30              | 00:30          | 00:30                |
| <b>SCAN TIME</b>                       | 02:43              | 04:12          | 03:11                |
| <b>TOTAL TIME (MIN)</b>                | 03:13              | 04:42          | 03:41                |

|                                        |                    |                  |                      |
|----------------------------------------|--------------------|------------------|----------------------|
| <b>STUDY</b>                           | <b>OBI - ONDRI</b> |                  |                      |
| <b>SEQUENCE</b>                        | <b>2D FLAIR</b>    |                  |                      |
| <b>Protocol</b>                        |                    |                  |                      |
| Vendor                                 | GE                 | Philips          | Siemens              |
| Field Strength                         | 3T                 | 3T               | 3T                   |
| Model                                  | Discovery          | Achieva          | Skyra/Trio/Prisma    |
| Version                                | 22                 | 3.2.3            |                      |
| Sequence Name                          | 2D T2FLAIR         | 2D IR TSE        | 2D IR TDF            |
| Imaging Options                        | EDR, IR            | Fast (Sense)     | iPat                 |
| <b>Pulse Timing</b>                    |                    |                  |                      |
| TE (ms)                                | 140                | 125              | 120                  |
| TR (ms)                                | 9000               | 9000             | 9000                 |
| Flip Angle (°)                         | 125                | 90 (150 refocus) | 165                  |
| TI (ms)                                | 2250               | 2500             | 2500                 |
| <b>Scan Range</b>                      |                    |                  |                      |
| FOV (in-plane) (mm)                    | 240 x 240          | 240 x 240        | 240 x 240            |
| Slice Thickness (mm)                   | 3                  | 3                | 3                    |
| Gap Between Slices (mm)                | 0                  | 0                | 0                    |
| No. Slices                             | 48                 | 48               | 48                   |
| <b>Acquisition</b>                     |                    |                  |                      |
| Orientation                            | Oblique Axial      | Oblique Axial    | Oblique Axial        |
| Matrix Size                            | 256 x 256          | 256 x 242        | 256 x 256            |
| Voxel Size [L/R x A/P x I/S]           | 0.94 x 0.94 x 3    | 0.94 x 0.99 x 3  | 0.94 x 0.94 x 3      |
| NEX                                    | 1                  | 1                | 1                    |
| Acceleration Factor (Parallel factor*) | No Asset           | 2 (SENSE)        | 2                    |
| <b>Other</b>                           |                    |                  |                      |
| Fat Suppression                        | None               | None             | None                 |
| Bandwidth                              | 25 (kHz)           | 242 (Hz/px)      | 220 (Hz/px)          |
| Echo Train Length                      |                    | 19               | 19                   |
| <b>Coil Type</b>                       |                    |                  |                      |
| Head                                   | X                  | X                | X                    |
| Channel                                | 8-12 (HNS)         | 8                | 12(Trio) 20 (Prisma) |
| <b>Time</b>                            |                    |                  |                      |
| <b>PRESCAN TIME+</b>                   | 00:30              | 00:30            | 00:30                |
| <b>SCAN TIME</b>                       | 04:32              | 03:45            | 02:44                |
| <b>TOTAL TIME (MIN)</b>                | 05:02              | 04:15            | 03:14                |

|                                        |                    |                 |                      |
|----------------------------------------|--------------------|-----------------|----------------------|
| <b>STUDY</b>                           | <b>OBI - ONDRI</b> |                 |                      |
| <b>SEQUENCE</b>                        | <b>T2-star</b>     |                 |                      |
| <b>Protocol</b>                        |                    |                 |                      |
| Vendor                                 | GE                 | Philips         | Siemens              |
| Field Strength                         | 3T                 | 3T              | 3T                   |
| Model                                  | Discovery          | Achieva         | Skyra/Trio/Prisma    |
| Version                                | 22                 | 3.2.3           |                      |
| Sequence Name                          | GRE                | FFE             | GRE                  |
| Imaging Options                        | -                  | Sense           | iPat                 |
| <b>Pulse Timing</b>                    |                    |                 |                      |
| TE (ms)                                | 20                 | 21              | 20                   |
| TR (ms)                                | 650                | 650             | 650                  |
| Flip Angle (°)                         | 20                 | 20              | 20                   |
| TI (ms)                                | -                  | -               | -                    |
| <b>Scan Range</b>                      |                    |                 |                      |
| FOV (in-plane) (mm)                    | 240 x 240          | 240 x 240       | 240 x 240            |
| Phase FOV                              | 75%                | 75%             | 75%                  |
| Slice Thickness (mm)                   | 3                  | 3               | 3                    |
| Gap Between Slices (mm)                | 0                  | 0               | 0                    |
| No. Slices                             | 48                 | 48              | 48                   |
| <b>Acquisition</b>                     |                    |                 |                      |
| Orientation                            | Oblique Axial      | Oblique Axial   | Oblique Axial        |
| Matrix Size                            | 256 x 256          | 256 x 256       | 256 x 256            |
| Voxel Size [L/R x A/P x I/S]           | 0.94 x 0.94 x 3    | 0.94 x 0.94 x 3 | 0.94 x 0.94 x 3      |
| NEX                                    | 1                  | 1               | 1                    |
| Acceleration Factor (Parallel factor*) | No Asset           | 2 (SENSE)       | 2                    |
| <b>Other</b>                           |                    |                 |                      |
| Fat Suppression                        | None               | None            | None                 |
| Bandwidth                              | 19.23 (kHz)        | 217 (Hz/px)     | 200 (Hz/px)          |
| Echo Train Length                      | 1                  | 1               | 1                    |
| CV act_te (GE only)                    | 20000              |                 |                      |
| <b>Coil Type</b>                       |                    |                 |                      |
| Head                                   | X                  | X               | X                    |
| Channel                                | 8-12 (HNS)         | 8               | 12(Trio) 20 (Prisma) |
| <b>Time</b>                            |                    |                 |                      |
| <b>PRESCAN TIME+</b>                   | 00:30              | 00:30           | 00:30                |
| <b>SCAN TIME</b>                       | 02:15              | 02:52           | 03:04                |
| <b>TOTAL TIME (MIN)</b>                |                    |                 |                      |

| <b>STUDY</b>                           | <b>OBI - ONDRI</b>  |                                      |                      |
|----------------------------------------|---------------------|--------------------------------------|----------------------|
| <b>SEQUENCE</b>                        | <b>fMRI-RS</b>      |                                      |                      |
| <b>Protocol</b>                        |                     |                                      |                      |
| Vendor                                 | GE                  | Philips                              | Siemens              |
| Field Strength                         | 3T                  | 3T                                   | 3T                   |
| Model                                  | Discovery           | Achieva                              | Skyra/Trio/Prisma    |
| Version                                | 22                  | 3.2.3                                |                      |
| Sequence Name                          | fMRI EPI            | fMRI EPI                             | fMRI EPI             |
| Imaging Options                        | EDR,<br>"eyes open" | GRE EPI, CLEAR<br>SENSE, "eyes open" | "eyes open"          |
| <b>Pulse Timing</b>                    |                     |                                      |                      |
| TE (ms)                                | 30                  | 30                                   | 30                   |
| TR (ms)                                | 2400                | 2400                                 | 2400                 |
| Flip Angle (°)                         | 70                  | 70                                   | 70                   |
| TI (ms)                                | -                   | -                                    | -                    |
| <b>Scan Range</b>                      |                     |                                      |                      |
| FOV (in-plane) (mm)                    | 224 x 224           | 224 x 224                            | 224 x 224            |
| Slice Thickness (mm)                   | 3.5                 | 3.5                                  | 3.5                  |
| Gap Between Slices (mm)                | 0                   | 0                                    | 0                    |
| No. Slices                             | 41                  | 41                                   | 41                   |
| <b>Acquisition</b>                     |                     |                                      |                      |
| Orientation                            | Oblique Axial       | Oblique Axial                        | Oblique Axial        |
| Matrix Size                            | 64 x 64             | 64 x 64                              | 64 x 64              |
| Voxel Size [L/R x A/P x I/S]           | 3.5 x 3.5 x 3.5     | 3.5 x 3.5 x 3.5                      | 3.5 x 3.5 x 3.5      |
| NEX                                    | 1                   | 1                                    | 1                    |
| Acceleration Factor (Parallel factor*) | 2                   | 2                                    | 2                    |
| Slice Order                            |                     | Ascending                            |                      |
| <b>Other</b>                           |                     |                                      |                      |
| Fat Suppression                        | Fat Sat.            | Fat Sat. SPIR                        | Fat Sat.             |
| Bandwidth (Hz/Px)                      | 7812                | 2441                                 | 2440                 |
| Number of acquisitions                 | 250                 | 250                                  | 250                  |
| EPI Factor                             |                     | 35                                   | 31                   |
| <b>Coil Type</b>                       |                     |                                      |                      |
| Head                                   | X                   | X                                    | X                    |
| Channel                                | 8-12 (HNS)          | 8                                    | 12(Trio) 20 (Prisma) |
| <b>Time</b>                            |                     |                                      |                      |
| <b>PRESCAN TIME+</b>                   | 00:30               | 00:30                                | 00:30                |
| <b>SCAN TIME</b>                       | 10:00               | 10:00                                | 10:00                |
| <b>TOTAL TIME (MIN)</b>                | 10:30               | 10:30                                | 10:30                |

|                                        |                    |               |                    |                    |
|----------------------------------------|--------------------|---------------|--------------------|--------------------|
| <b>STUDY</b>                           | <b>OBI - ONDRI</b> |               |                    |                    |
| <b>SEQUENCE</b>                        | <b>DTI</b>         |               |                    |                    |
| <b>Protocol</b>                        |                    |               |                    |                    |
| Vendor                                 | GE                 | Philips       | Siemens            | Siemens            |
| Field Strength                         | 3T                 | 3T            | 3T                 | 3T                 |
| Model                                  | Discovery          | Achieva       | Skyra/Trio/Prisma  | Skyra/Trio/Prisma  |
| Version                                | 22                 | 3.2.3         |                    | 17                 |
| Sequence Name                          | DWI                | DWI           | DWI                | DWI                |
| Imaging Options                        | ASSET              | Sense         | iPat               | iPat               |
| <b>Pulse Timing</b>                    |                    |               |                    |                    |
| TE (ms)                                | Min                | 100           | 96/ 63(Prisma)     | 96/ 64 (Prisma)    |
| TR (ms)                                | 9000               | 9931          | 9400               | 9400               |
| Flip Angle (°)                         | 90                 | 90            | 90                 | 90                 |
| TI (ms)                                | -                  | -             | -                  | -                  |
| <b>Scan Range</b>                      |                    |               |                    |                    |
| FOV (in-plane) (mm)                    | 256 x 256          | 256x 256      | 256 x 256          | 256 x 256          |
| Slice Thickness (mm)                   | 2                  | 2             | 2                  | 2                  |
| Gap Between slices (mm)                | 0                  | 0             | 0                  | 0                  |
| No. Slices                             | 70                 | 70            | 70                 | 70                 |
| <b>Acquisition</b>                     |                    |               |                    |                    |
| Orientation                            | Oblique Axial      | Oblique Axial | Oblique Axial      | Oblique Axial      |
| Matrix Size                            | 128 x 128          | 128 x 128     | 128 x 128          | 128 x 128          |
| Voxel Size (L/R x A/P x I/S)           | 2 x 2 x 2          | 2 x 2 x 2     | 2 x 2 x 2          | 2 x 2 x 2          |
| NEX                                    | 1                  | 1             | 1                  | 1                  |
| Acceleration Factor (Parallel factor*) | 2                  | 2             | 2                  | 2                  |
| <b>Diffusion</b>                       |                    |               |                    |                    |
| b-value 1                              | 0                  | 0             | 0                  | 0                  |
| b-value 2                              | 1000               | 1000          | 1000               |                    |
| Number of Directions                   | 30                 | 32            | 30                 | 1                  |
| <b>Other</b>                           |                    |               |                    |                    |
| Fat Suppression                        | FatSat             | FatSat        | FatSat             | FatSat             |
| Bandwidth (Hz/Px)                      |                    | 2045          | 2056               | 2056               |
| T2 Images                              | 3                  | 3             | 3                  |                    |
| EPI Factor                             |                    | 67            | 128                | 128                |
| Gradients                              |                    |               | Monopolar (Prisma) | Monopolar (Prisma) |
| CV rhimsize (GE only)                  | 128                |               |                    |                    |
| <b>Coil Type</b>                       |                    |               |                    |                    |

|                         |            |        |                      |                      |
|-------------------------|------------|--------|----------------------|----------------------|
| Head                    | x          | x      | x                    | x                    |
| Channel                 | 8-12 (HNS) | 8      | 12(Trio) 20 (Prisma) | 12(Trio) 20 (Prisma) |
| <b>Time</b>             |            |        |                      |                      |
| <b>PRESCAN TIME+</b>    | 00:30      | 00:30  | 00:30                | 00:30                |
| <b>SCAN TIME</b>        | 05:06      | 0:6:58 | 05:21                | 00:39                |
| <b>TOTAL TIME (MIN)</b> | 05:36      | 07:28  | 05:33                | 01:08                |

**Core Protocol Scan Time Estimates**

|                                       | <i>GE</i>    | <i>Philips</i> | <i>Siemens</i> |
|---------------------------------------|--------------|----------------|----------------|
| Set up                                | 05:00        | 05:00          | 05:00          |
| 3DT1                                  | 05:22        | 06:47          | 05:51          |
| PD/T2                                 | 02:49        | 04:42          | 03:41          |
| 2D FLAIR                              | 05:02        | 04:15          | 03:14          |
| T2-star or T2-star_PM or T2-star_PMRI | 03:45        | 03:22          | 03:34          |
| RS-fMRI                               | 10:30        | 10:30          | 10:30          |
| DTI                                   | 06:30        | 07:28          | 06:41          |
| Set down                              | 02:30        | 02:30          | 02:30          |
| <b>Total scan time</b>                | 33:58        | 37:04          | 33:31          |
| <b>Total session time</b>             | <b>41:28</b> | <b>44:34</b>   | <b>41:01</b>   |
|                                       |              |                |                |
